# Supplementary material for: Characterization of the In Vitro and In Vivo Efficacy of Baloxavir Marboxil against H5 Highly Pathogenic Avian Influenza Virus Infection
Source: MDPI journal article supplement (doi:10.3390/v14010111), 2022-01-08
Supplement: s1 [file s1]

## Supplementary data

**Table S1** Details of animal experiments

### Experiment 1

Examination of the survival effect in mice infected with H5N1 virus (in Figure 1 and Figure S1)

| Administration                                             | Number of mice |
|------------------------------------------------------------|----------------|
| Vehicle (0.5 w/v% methylcellulose), twice daily for 5 days | 10             |
| OSP, 5 mg/kg/dose, twice daily for 5 days                  | 10             |
| OSP, 50 mg/kg/dose, twice daily for 5 days                 | 10             |
| BXM, 0.5 mg/kg/dose, twice daily for 1 day                 | 10             |
| BXM, 5 mg/kg/dose, twice daily for 1 day                   | 10             |
| BXM, 50 mg/kg/dose, twice daily for 1 day                  | 10             |
| BXM, 0.5 mg/kg/dose, twice daily for 5 days                | 10             |
| BXM, 5 mg/kg/dose, twice daily for 5 days                  | 10             |
| BXM, 50 mg/kg/dose, twice daily for 5 days                 | 10             |

Examination of inhibitory effects on viral titers and cytokines in the lungs of mice infected with H5N1 virus (in Figure 2a and 3a)

| Administration                                             | Number of mice       |                |   |
|------------------------------------------------------------|----------------------|----------------|---|
|                                                            | Sampling point (dpi) |                |   |
|                                                            | 1                    | 3              | 5 |
| Vehicle (0.5 w/v% methylcellulose), twice daily for 5 days | 5                    | 5              | 5 |
| OSP, 5 mg/kg/dose, twice daily for 5 days                  | 5                    | 5              | 5 |
| OSP, 50 mg/kg/dose, twice daily for 5 days                 | 5                    | 5              | 5 |
| BXM, 0.5 mg/kg/dose, twice daily for 1 day                 | 5                    | 5              | 5 |
| BXM, 5 mg/kg/dose, twice daily for 1 day                   | 5                    | 5              | 5 |
| BXM, 50 mg/kg/dose, twice daily for 1 day                  | 5                    | 5              | 5 |
| BXM, 0.5 mg/kg/dose, twice daily for 5 days                | -                    | 5              | 5 |
| BXM, 5 mg/kg/dose, twice daily for 5 days                  | -                    | 5              | 5 |
| BXM, 50 mg/kg/dose, twice daily for 5 days                 | -                    | 4 <sup>#</sup> | 5 |

# One of 5 mice was died due to an experimental error.

Examination of inhibitory effects on viral titers in the brains and kidneys of mice infected with H5N1 virus at 6 dpi (in Figure 2b and c)

| Administration                                             | Number of mice |
|------------------------------------------------------------|----------------|
| Vehicle (0.5 w/v% methylcellulose), twice daily for 5 days | 5              |
| OSP, 5 mg/kg/dose, twice daily for 5 days                  | 5              |
| OSP, 50 mg/kg/dose, twice daily for 5 days                 | 5              |
| BXM, 0.5 mg/kg/dose, twice daily for 1 day                 | 5              |
| BXM, 5 mg/kg/dose, twice daily for 1 day                   | 5              |
| BXM, 50 mg/kg/dose, twice daily for 1 day                  | 5              |
| BXM, 0.5 mg/kg/dose, twice daily for 5 days                | 5              |
| BXM, 5 mg/kg/dose, twice daily for 5 days                  | 5              |
| BXM, 50 mg/kg/dose, twice daily for 5 days                 | 5              |

Examination of prevention of inflammation in the lungs of mice infected with H5N1 virus (in Figure 3b and Figure S2)

| Administration                                             | Number of mice |
|------------------------------------------------------------|----------------|
| Vehicle (0.5 w/v% methylcellulose), twice daily for 5 days | 3              |
| OSP, 5 mg/kg/dose, twice daily for 5 days                  | 3              |
| OSP, 50 mg/kg/dose, twice daily for 5 days                 | 3              |
| BXM, 0.5 mg/kg/dose, twice daily for 1 day                 | 3              |
| BXM, 5 mg/kg/dose, twice daily for 1 day                   | 3              |
| BXM, 50 mg/kg/dose, twice daily for 1 day                  | 3              |
| BXM, 0.5 mg/kg/dose, twice daily for 5 days                | 3              |
| BXM, 5 mg/kg/dose, twice daily for 5 days                  | 3              |
| BXM, 50 mg/kg/dose, twice daily for 5 days                 | 3              |
| Mock                                                       | 3              |

Examination of prevention of lung indices in mice infected with H5N1 virus (in Figure S3)

| Administration                                             | Number of mice |
|------------------------------------------------------------|----------------|
| Vehicle (0.5 w/v% methylcellulose), twice daily for 5 days | 5              |
| OSP, 5 mg/kg/dose, twice daily for 5 days                  | 5              |
| OSP, 50 mg/kg/dose, twice daily for 5 days                 | 5              |
| BXM, 0.5 mg/kg/dose, twice daily for 1 day                 | 5              |
| BXM, 5 mg/kg/dose, twice daily for 1 day                   | 5              |
| BXM, 50 mg/kg/dose, twice daily for 1 day                  | 5              |
| BXM, 0.5 mg/kg/dose, twice daily for 5 days                | 5              |
| BXM, 5 mg/kg/dose, twice daily for 5 days                  | 5              |
| BXM, 50 mg/kg/dose, twice daily for 5 days                 | 5              |
| Mock                                                       | 5              |

## Experiment 2

Examination of the survival effect in mice infected with H5N1 virus (in Figure 5)

| Administration                                               | Number of mice |
|--------------------------------------------------------------|----------------|
| Vehicle (0.5 w/v% methylcellulose), twice daily for 5 days   | 5              |
| OSP, 10 mg/kg/dose, twice daily for 5 days                   | 5              |
| BXM, 5 mg/kg/dose, twice daily for 5 days                    | 5              |
| BXM, 50 mg/kg/dose, twice daily for 5 days                   | 5              |
| BXM 5 mg/kg/dose + OSP 10 mg/kg/dose, twice daily for 5 days | 5              |

Examination of inhibitory effects on viral titers in the lungs, brains or kidneys of mice infected with H5N1 virus (in Figure 6)

| Administration                                               | Number of mice       |   |   |                |
|--------------------------------------------------------------|----------------------|---|---|----------------|
|                                                              | Sampling point (dpi) |   |   |                |
|                                                              | 1                    | 3 | 5 | 7              |
| Vehicle (0.5 w/v% methylcellulose), twice daily for 5 days   | 5                    | 5 | 5 | 3 <sup>#</sup> |
| OSP, 10 mg/kg/dose, twice daily for 5 days                   | 5                    | 5 | 5 | 3 <sup>#</sup> |
| BXM, 5 mg/kg/dose, twice daily for 5 days                    | 5                    | 5 | 5 | 5              |
| BXM, 50 mg/kg/dose, twice daily for 5 days                   | 5                    | 5 | 5 | 5              |
| BXM 5 mg/kg/dose + OSP 10 mg/kg/dose, twice daily for 5 days | 5                    | 5 | 5 | 5              |

# Two of 5 mice in each group were died by 7 dpi.

**Table S2.** Quantification of viral RNA and titers from lung homogenates of BXM-treated mice

| Lung ID | Administration                              | Sampling point (dpi) | Viral RNA (copy/reaction) | Viral titers (Log <sub>10</sub> TCID <sub>50</sub> /mL) |
|---------|---------------------------------------------|----------------------|---------------------------|---------------------------------------------------------|
| 16      | BXM, 0.5 mg/kg/dose, twice daily for 1 day  | 1                    | 3.11E+03                  | 2.67                                                    |
| 17      | BXM, 0.5 mg/kg/dose, twice daily for 1 day  | 1                    | 4.84E+03                  | 2.23                                                    |
| 18      | BXM, 0.5 mg/kg/dose, twice daily for 1 day  | 1                    | 1.40E+04                  | 3.33                                                    |
| 19      | BXM, 0.5 mg/kg/dose, twice daily for 1 day  | 1                    | 3.51E+03                  | 2.67                                                    |
| 20      | BXM, 0.5 mg/kg/dose, twice daily for 1 day  | 1                    | BLQ                       | 1.50*                                                   |
| 21      | BXM, 5 mg/kg/dose, twice daily for 1 day    | 1                    | BLQ                       | 1.50*                                                   |
| 22      | BXM, 5 mg/kg/dose, twice daily for 1 day    | 1                    | BLQ                       | 1.50*                                                   |
| 23      | BXM, 5 mg/kg/dose, twice daily for 1 day    | 1                    | BLQ                       | 1.50*                                                   |
| 24      | BXM, 5 mg/kg/dose, twice daily for 1 day    | 1                    | BLQ                       | 1.50*                                                   |
| 25      | BXM, 5 mg/kg/dose, twice daily for 1 day    | 1                    | BLQ                       | 1.50*                                                   |
| 26      | BXM, 50 mg/kg/dose, twice daily for 1 day   | 1                    | BLQ                       | 1.50*                                                   |
| 27      | BXM, 50 mg/kg/dose, twice daily for 1 day   | 1                    | BLQ                       | 1.50*                                                   |
| 28      | BXM, 50 mg/kg/dose, twice daily for 1 day   | 1                    | BLQ                       | 1.50*                                                   |
| 29      | BXM, 50 mg/kg/dose, twice daily for 1 day   | 1                    | BLQ                       | 1.50*                                                   |
| 30      | BXM, 50 mg/kg/dose, twice daily for 1 day   | 1                    | BLQ                       | 1.50*                                                   |
| 46      | BXM, 0.5 mg/kg/dose, twice daily for 5 days | 3                    | 1.45E+05                  | 3.67                                                    |
| 47      | BXM, 0.5 mg/kg/dose, twice daily for 5 days | 3                    | 4.94E+05                  | 3.50                                                    |
| 48      | BXM, 0.5 mg/kg/dose, twice daily for 5 days | 3                    | 2.58E+04                  | 3.23                                                    |
| 49      | BXM, 0.5 mg/kg/dose, twice daily for 5 days | 3                    | 2.25E+04                  | 3.50                                                    |
| 50      | BXM, 0.5 mg/kg/dose, twice daily for 5 days | 3                    | 9.26E+03                  | 2.67                                                    |
| 51      | BXM, 5 mg/kg/dose, twice daily for 5 days   | 3                    | BLQ                       | 1.67                                                    |
| 52      | BXM, 5 mg/kg/dose, twice daily for 5 days   | 3                    | BLQ                       | 1.50*                                                   |
| 53      | BXM, 5 mg/kg/dose, twice daily for 5 days   | 3                    | BLQ                       | 1.50*                                                   |
| 54      | BXM, 5 mg/kg/dose, twice daily for 5 days   | 3                    | BLQ                       | 1.50*                                                   |
| 55      | BXM, 5 mg/kg/dose, twice daily for 5 days   | 3                    | BLQ                       | 1.50*                                                   |
| 57      | BXM, 50 mg/kg/dose, twice daily for 5 days  | 3                    | BLQ                       | 1.50*                                                   |
| 58      | BXM, 50 mg/kg/dose, twice daily for 5 days  | 3                    | BLQ                       | 1.50*                                                   |
| 59      | BXM, 50 mg/kg/dose, twice daily for 5 days  | 3                    | BLQ                       | 1.50*                                                   |
| 60      | BXM, 50 mg/kg/dose, twice daily for 5 days  | 3                    | BLQ                       | 1.50*                                                   |
| 61      | BXM, 0.5 mg/kg/dose, twice daily for 1 day  | 3                    | BLQ                       | 1.67                                                    |
| 62      | BXM, 0.5 mg/kg/dose, twice daily for 1 day  | 3                    | 4.20E+05                  | 4.00                                                    |
| 63      | BXM, 0.5 mg/kg/dose, twice daily for 1 day  | 3                    | 1.33E+06                  | 4.50                                                    |
| 64      | BXM, 0.5 mg/kg/dose, twice daily for 1 day  | 3                    | 1.62E+05                  | 4.33                                                    |
| 65      | BXM, 0.5 mg/kg/dose, twice daily for 1 day  | 3                    | 1.16E+06                  | 4.67                                                    |

|     |                                             |   |          |       |
|-----|---------------------------------------------|---|----------|-------|
| 66  | BXM, 0.5 mg/kg/dose, twice daily for 1 day  | 3 | BLQ      | 1.50* |
| 67  | BXM, 5 mg/kg/dose, twice daily for 1 day    | 3 | 2.65E+04 | 4.00  |
| 68  | BXM, 5 mg/kg/dose, twice daily for 1 day    | 3 | BLQ      | 2.77  |
| 69  | BXM, 5 mg/kg/dose, twice daily for 1 day    | 3 | BLQ      | 1.50* |
| 70  | BXM, 5 mg/kg/dose, twice daily for 1 day    | 3 | BLQ      | 1.50* |
| 71  | BXM, 5 mg/kg/dose, twice daily for 1 day    | 3 | BLQ      | 1.50* |
| 72  | BXM, 50 mg/kg/dose, twice daily for 1 day   | 3 | BLQ      | 1.50* |
| 73  | BXM, 50 mg/kg/dose, twice daily for 1 day   | 3 | BLQ      | 1.50* |
| 74  | BXM, 50 mg/kg/dose, twice daily for 1 day   | 3 | BLQ      | 1.50* |
| 75  | BXM, 50 mg/kg/dose, twice daily for 1 day   | 3 | BLQ      | 1.50* |
| 91  | BXM, 0.5 mg/kg/dose, twice daily for 5 days | 5 | 2.18E+04 | 3.67  |
| 92  | BXM, 0.5 mg/kg/dose, twice daily for 5 days | 5 | 1.62E+05 | 3.33  |
| 93  | BXM, 0.5 mg/kg/dose, twice daily for 5 days | 5 | 8.22E+05 | 3.00  |
| 94  | BXM, 0.5 mg/kg/dose, twice daily for 5 days | 5 | 8.84E+04 | 1.50* |
| 95  | BXM, 0.5 mg/kg/dose, twice daily for 5 days | 5 | 2.56E+05 | 3.50  |
| 96  | BXM, 5 mg/kg/dose, twice daily for 5 days   | 5 | BLQ      | 1.50* |
| 97  | BXM, 5 mg/kg/dose, twice daily for 5 days   | 5 | BLQ      | 1.50* |
| 98  | BXM, 5 mg/kg/dose, twice daily for 5 days   | 5 | BLQ      | 1.50* |
| 99  | BXM, 5 mg/kg/dose, twice daily for 5 days   | 5 | BLQ      | 1.50* |
| 100 | BXM, 5 mg/kg/dose, twice daily for 5 days   | 5 | BLQ      | 1.50* |
| 101 | BXM, 50 mg/kg/dose, twice daily for 5 days  | 5 | BLQ      | 1.50* |
| 102 | BXM, 50 mg/kg/dose, twice daily for 5 days  | 5 | BLQ      | 1.50* |
| 103 | BXM, 50 mg/kg/dose, twice daily for 5 days  | 5 | BLQ      | 1.50* |
| 104 | BXM, 50 mg/kg/dose, twice daily for 5 days  | 5 | BLQ      | 1.50* |
| 105 | BXM, 50 mg/kg/dose, twice daily for 5 days  | 5 | BLQ      | 1.50* |
| 106 | BXM, 0.5 mg/kg/dose, twice daily for 1 day  | 5 | 2.29E+06 | 4.00  |
| 107 | BXM, 0.5 mg/kg/dose, twice daily for 1 day  | 5 | 4.68E+04 | 2.50  |
| 108 | BXM, 0.5 mg/kg/dose, twice daily for 1 day  | 5 | 1.00E+06 | 5.17  |
| 109 | BXM, 0.5 mg/kg/dose, twice daily for 1 day  | 5 | 2.68E+06 | 6.50  |
| 110 | BXM, 0.5 mg/kg/dose, twice daily for 1 day  | 5 | 2.96E+06 | 4.67  |
| 111 | BXM, 0.5 mg/kg/dose, twice daily for 1 day  | 5 | BLQ      | 2.50  |
| 112 | BXM, 5 mg/kg/dose, twice daily for 1 day    | 5 | BLQ      | 1.50* |
| 113 | BXM, 5 mg/kg/dose, twice daily for 1 day    | 5 | BLQ      | 1.50* |
| 114 | BXM, 5 mg/kg/dose, twice daily for 1 day    | 5 | BLQ      | 1.50* |
| 115 | BXM, 5 mg/kg/dose, twice daily for 1 day    | 5 | BLQ      | 1.50* |
| 116 | BXM, 5 mg/kg/dose, twice daily for 1 day    | 5 | BLQ      | 1.50* |
| 117 | BXM, 50 mg/kg/dose, twice daily for 1 day   | 5 | BLQ      | 1.50* |
| 118 | BXM, 50 mg/kg/dose, twice daily for 1 day   | 5 | BLQ      | 1.50* |

|     |                                           |   |     |       |
|-----|-------------------------------------------|---|-----|-------|
| 119 | BXM, 50 mg/kg/dose, twice daily for 1 day | 5 | BLQ | 1.50* |
| 120 | BXM, 50 mg/kg/dose, twice daily for 1 day | 5 | BLQ | 1.50* |

---

BLQ = below the lower limit of quantification, \* the lower limit of quantification of the viral titer

**Table S3.** Summary of variants of the PA region in viral RNAs derived from lung homogenates

| Lung ID | Administration                              | Sampling point<br>(dpi) | Amino acid |            |              |                     |
|---------|---------------------------------------------|-------------------------|------------|------------|--------------|---------------------|
|         |                                             |                         | Position   | Reference  | Call         | Minor peak*         |
| 18      | BXM, 0.5 mg/kg/dose, twice daily for 1 day  | 1                       | 76         | F<br>(TTT) | F<br>(TTT)   | F<br>(TT <u>C</u> ) |
| 62      | BXM, 0.5 mg/kg/dose, twice daily for 1 day  | 3                       | 378        | K<br>(AAA) | K<br>(AAR**) | K<br>(AAG)          |
| 91      | BXM, 0.5 mg/kg/dose, twice daily for 5 days | 5                       | 127        | I<br>(ATT) | V<br>(GTT)   | I<br>(ATT)          |
| 94      | BXM, 0.5 mg/kg/dose, twice daily for 5 days | 5                       | 574        | K<br>(AAG) | K<br>(AAA)   | K<br>(AAG)          |

\* Minor peaks are judged when 25% or more of the first peak is detected., \*\* mixed base of A and G

**Table S4.** PA amino acid position at 127

| Influenza virus strains                       | Accession number* | Amino acid residue at 127 |
|-----------------------------------------------|-------------------|---------------------------|
| A/Hong Kong/483/1997 (H5N1)                   | AF084269          | I                         |
| A/ruddy turnstone/Delaware/103/2007 (H5N1)    | EPI296727         | V                         |
| A/muscovy duck/Vietnam/OIE-559/2011 (H5N1)    | EPI321743         | V                         |
| A/whooper swan/Mongolia/2/2006 (H5N1)         | AB263751          | V                         |
| A/black swan/Akita/1/2016 (H5N6)              | LC198527          | V                         |
| A/northern pintail/Hokkaido/M13/2020 (H5N8)   | MW228064          | I                         |
| A/whooper swan/Fukushima/0701B002/2021 (H5N8) | MZ235325          | I                         |
| A/whooper swan/Miyagi/0402B001/2021 (H5N8)    | MZ235317          | I                         |

\* Each sequence obtained from the National Center for Biotechnology Information (NCBI) and Global Initiative on Sharing All Influenza Data (GISAID) on December 26, 2021.

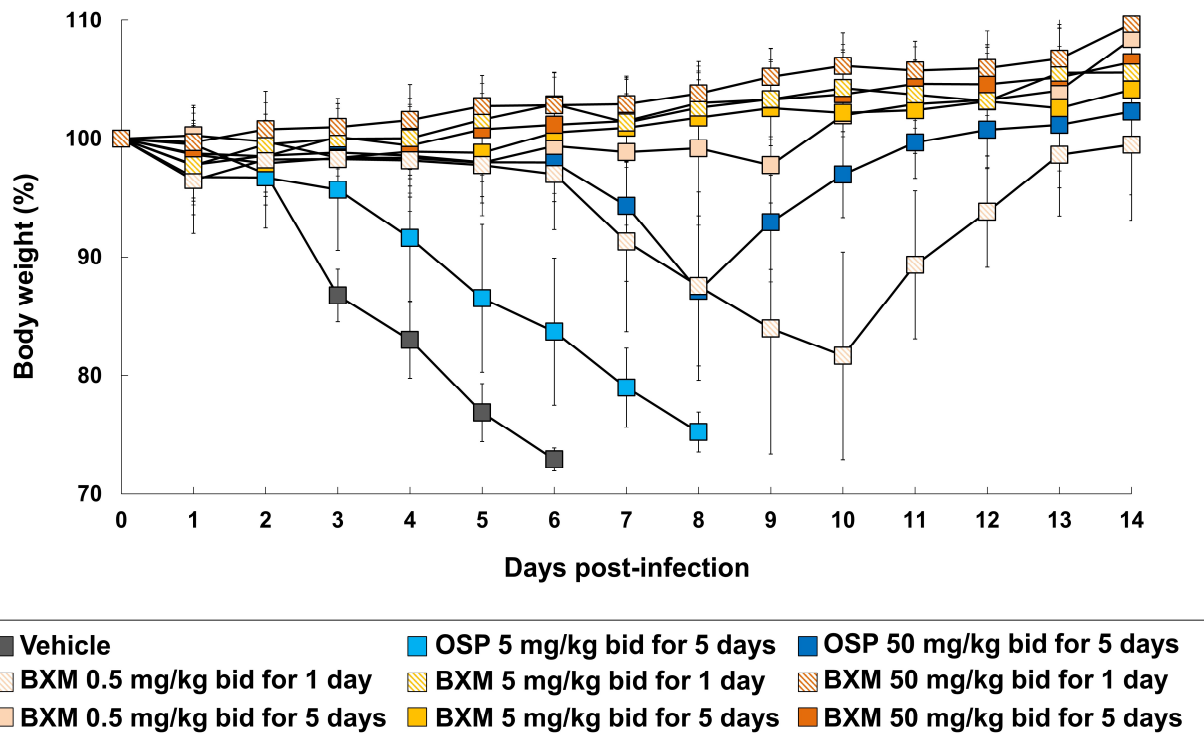

**Figure S1.** Therapeutic effects of BXM on body weight loss in a lethal infection mouse model with H5N1 HPAIV. Body weight changes were monitored through a 14-day period after infection. Details of mouse experiments are shown in the legend of Figure 1.



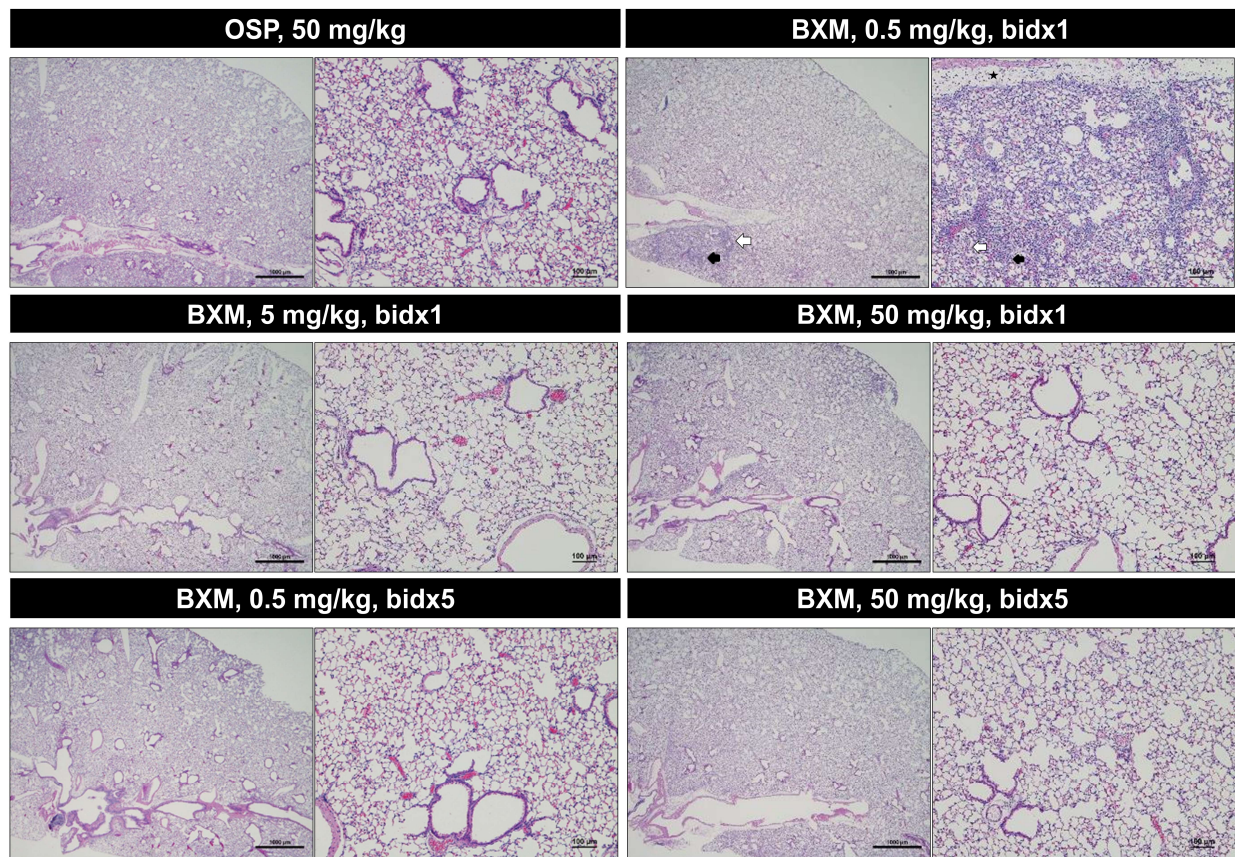

**Figure S2.** Histopathological findings from mice lungs following BXM treatment. The details of mouse experiments are shown in the legend of Figure 3B. Left panels of each dosing showed wide fields (2× magnification of objective), whereas right panels of each dosing showed narrow fields (20× magnification of objective). Black arrows indicate thickening and inflammatory cell infiltration of alveolar walls. White arrows indicate inflammatory cell infiltration within the alveoli. Black stars indicate edema.

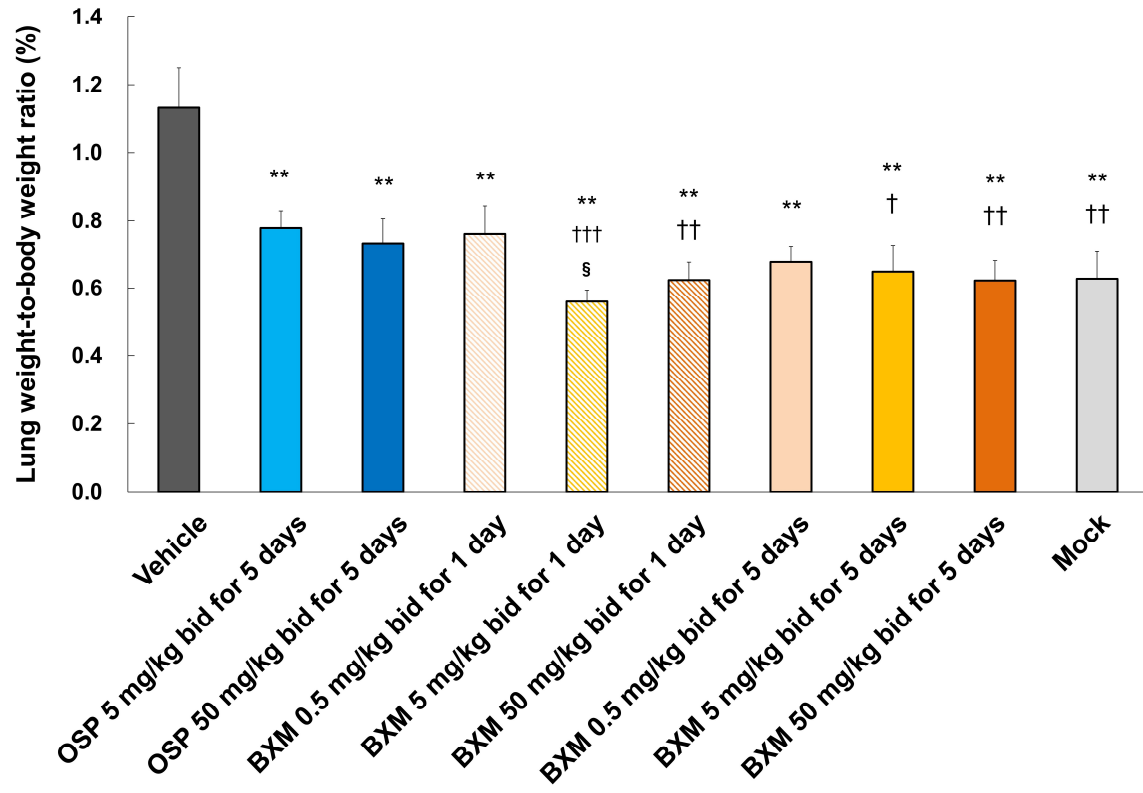

**Figure S3.** The prevention of lung indices in mice following BXM treatment. The body weights of mice were measured, after which whole lungs collected at 5 dpi were weighed. The lung wet weight-to-body weight ratio in each treatment group was then calculated as previously reported [44]. Dunnett's multiple-comparison method was employed for comparing the wet weight-to-body weight ratios of lungs between each group (\*\*  $p < 0.001$  compared to the vehicle. †  $p < 0.05$ , ††  $p < 0.01$ , †††  $p < 0.001$  compared to OSP at 5 mg/kg twice daily. §  $p < 0.05$  compared to OSP at 50 mg/kg twice daily).
